# Supplementary material for: Avoiding alkaline taste through ionotropic receptors
Source: PubMed Central journal article supplement (PMC11214294; doi:10.1016/j.isci.2024.110087), 2024-05-23
Supplement: mmc1.pdf [file mmc1.pdf]

**iScience, Volume 27**

**Supplemental information**

**Avoiding alkaline taste  
through ionotropic receptors**

**Prakash Pandey, Bhanu Shrestha, and Youngseok Lee**

**Supplemental Information**

**Avoiding Alkaline through Ionotropic Receptors**

**Prakash Pandey, Bhanu Shrestha, and Youngseok Lee**

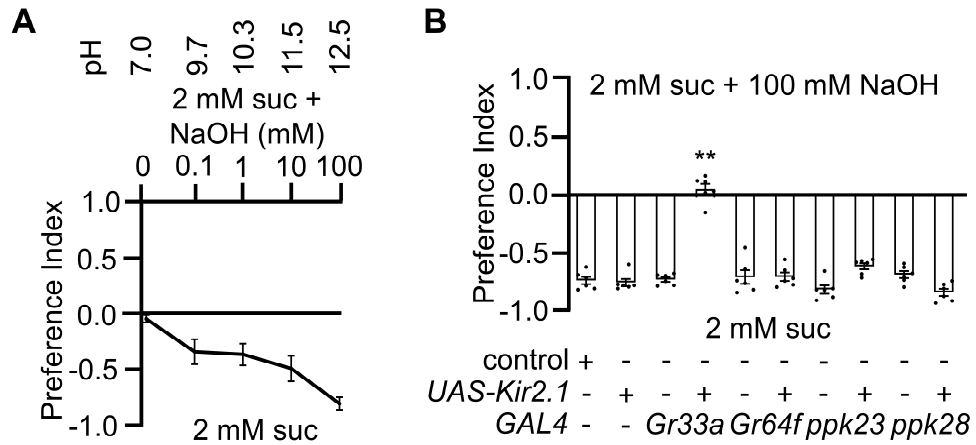

**Figure S1 (related to Figure 1). Binary food choice response of control flies in different concentrations of NaOH and specific GRN-ablated flies with 100 mM NaOH** (A) A dose-dependent binary food choice assay of control (*w<sup>1118</sup>*) flies using NaOH in the range of 0-100 mM (n = 6). (B) Feeding assays of specific GRN-ablated flies using 100 mM NaOH. +/- indicates the presence or absence of the transgene, respectively (n = 6). Data information: All error bars represent SEMs. Single-factor ANOVA, coupled with Scheffe's post hoc test, was conducted to compare multiple datasets. Asterisks indicate statistical significance compared to control. \*\**p* < 0.01.

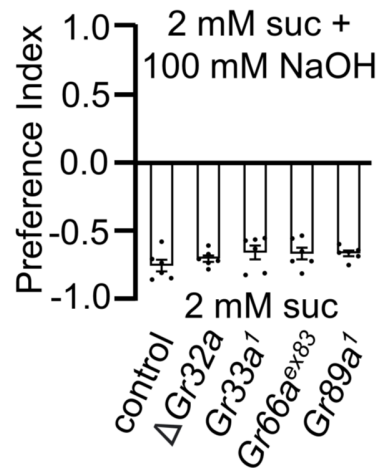

**Figure S2 (related to Figure 3). Binary food choice response of specific bitter sensing GRs with 100 mM NaOH**

Binary food choice assays of control,  $\Delta Gr32a$ ,  $Gr33a^1$ ,  $Gr66a^{ex83}$ , and  $Gr89a^1$  flies in the presence of 100 mM NaOH (n = 6). Data information: All error bars represent SEMs. Single-factor ANOVA, coupled with Scheffe's post hoc test, was conducted to compare multiple datasets.

**A***Gr66a-l-GFP,UAS-DsRed/Ir47a-GAL4*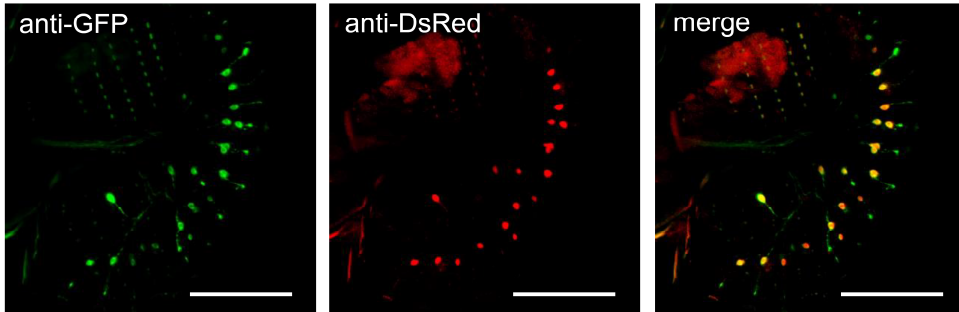**B**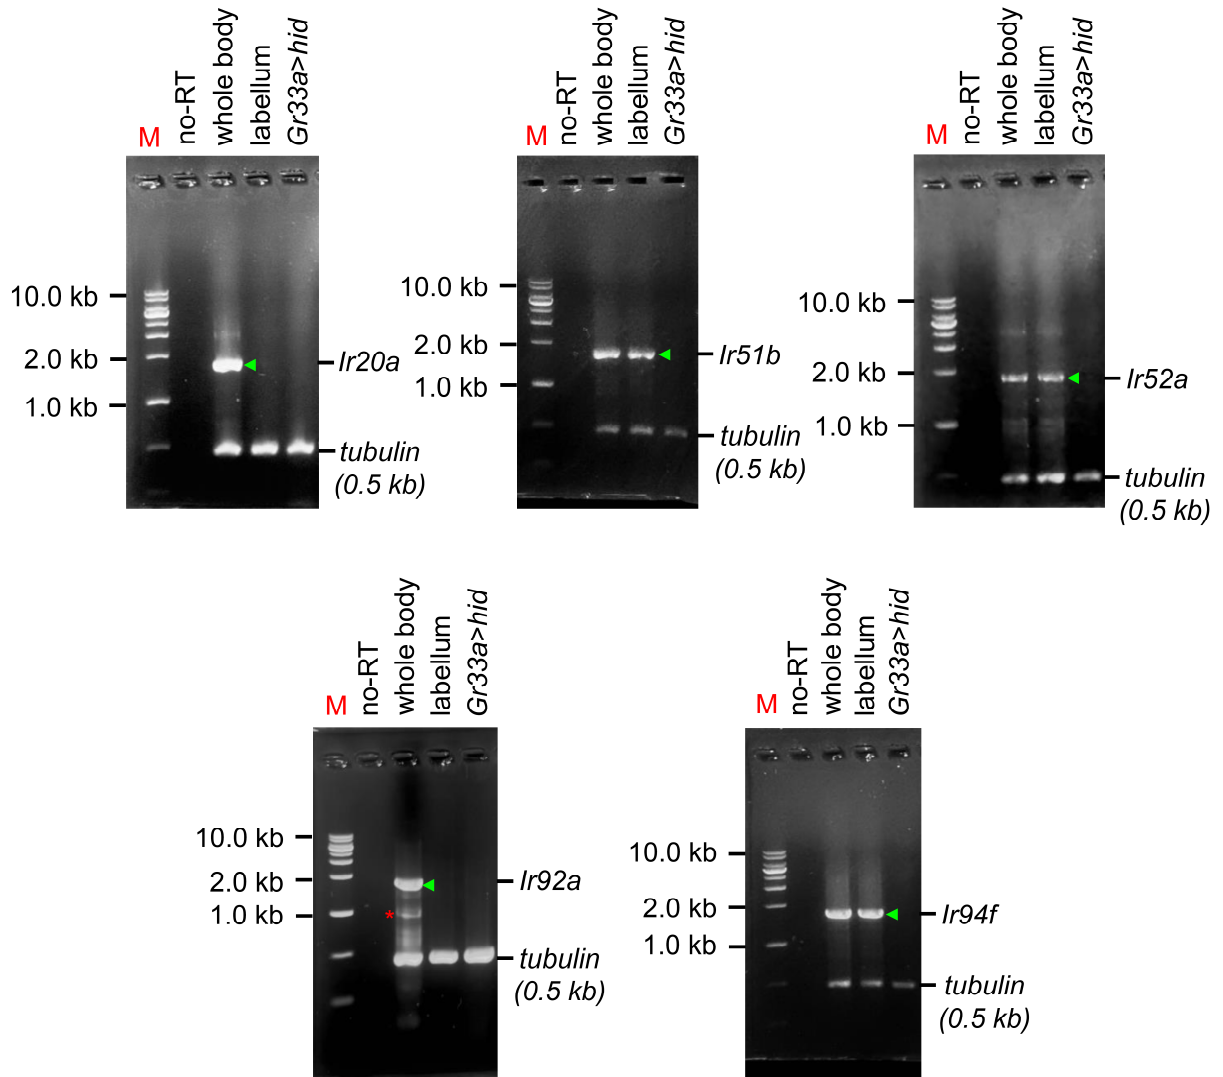

**Figure S3 (related to Figure 4). Expression of the *Ir47a-GAL4* reporter in subsets of *Gr66a*<sup>+</sup> GRNs and RT-PCR analysis of the *Irs* in whole body, labellum, and bitter GRN**

**(A)** *Gr66a-l-GFP* labeled all bitter responsive GRNs (anti-GFP, green), *UAS-DsRed* was expressed under the control of the *Ir47a-GAL4* (anti-DsRed, red). Most but not all *Ir47a*-positive cells were detected in a single confocal image. The merged image revealed a higher number of co-labeled neurons. The scale bars represent 50  $\mu$ m. **(B)** A gel picture of RT-PCR results showing the expression of *Ir51b*, *Ir52a*, and *Ir94f* in the labellum. The respective genes were amplified using RT-PCR in the control (*w<sup>1118</sup>*) and *Gr33a-GAL4/UAS-hid* (bitter-sensing GRNs ablated) flies. Amplified tubulin products (0.50 kb) were used as the control for PCR reaction. "M" indicates the DNA ladder marker. The green arrowhead represents the expected band size, and the red asterisk demonstrates the unspecific band. Band sizes of *Ir20a*, *Ir51b*, *Ir52a*, *Ir92a*, and *Ir94f* are 1.65 kb, 1.70 kb, 1.80 kb, 1.79 kb, and 1.64 kb, respectively.
